# Supplementary material
Source: ML conference proceedings conference paper supplement (https://aclanthology.org/D18-1407)
Supplement: Attachment [file D18-1407.Attachment.zip]

## A Model and Training Details

**SQUAD: Reading Comprehension** The model we use for SQUAD is the Document Reader of DRQA (Chen et al., 2017). We use the open source implementation from <https://github.com/hitvoice/DrQA>. The model represents the words of the paragraph as the concatenation of: GLOVE embeddings (Pennington et al., 2014), other word-level features, and attention scores between the words in the paragraph and the question. The model runs a BiLSTM over the sequence and takes the resulting hidden states at each time step as a word’s final vector representation. Two classifiers then predict the beginning and end of the answer span independently. The span with the highest product of beginning and end probabilities is selected as the answer. In input reduction, we keep the exact same span.

**SNLI: Textual Entailment** The model we use for SNLI is the Bilateral Multi-Perspective Matching Model (BiMPM) (Wang et al., 2017). We use the open source implementation from <https://github.com/galsang/BiMPM-pytorch>. The model runs a BiLSTM over the GLOVE word embeddings of both the premise and hypothesis. It then computes “matches” between the two sentences at multiple perspectives, aggregates the results using another BiLSTM, and feeds the resulting representation through fully-connected layers for classification.

**VQA: Visual Question Answering** The model we use for VQA is Show, Ask, Attend and Answer (Kazemi and Elqursh, 2017). We use the open source implementation from <https://github.com/Cyanogenoid/pytorch-vqa>. The model uses a ResNet-152 (He et al., 2016) to represent the image and an LSTM to represent the natural language question. The model then computes attention regions based on the two representations. All representations are finally combined to predict the answer.

**Entropy Regularized Fine-Tuning** To optimize the objective of Equation 2, we alternate updates on the two terms. We update the model on two batches of regular examples for the first term (maximum likelihood), followed by two batches of reduced examples for the second term (maximum entropy). The batches of reduced examples are randomly sampled from the collection of re-

duced inputs. We use two separate Adam (Kingma and Ba, 2015) optimizers for the two terms. For SQUAD and SNLI, we use a learning rate of  $2e^{-4}$  and  $\lambda$  of  $1e^{-3}$ . For VQA, we use a learning rate of  $1e^{-4}$  and  $\lambda$  of  $1e^{-4}$ .

## B More Examples

This section provides more examples of input reduction. We show the original and reduced examples, which are generated on the models both *Before* and *After* fine-tuning with the entropy regularization from Section 4. All examples are correctly classified by the model.

## SQUAD

|          |                                                                                                                                                                                                                                                                                                                                                                                                                                                                                                                                                                                                                                                                                                                                   |
|----------|-----------------------------------------------------------------------------------------------------------------------------------------------------------------------------------------------------------------------------------------------------------------------------------------------------------------------------------------------------------------------------------------------------------------------------------------------------------------------------------------------------------------------------------------------------------------------------------------------------------------------------------------------------------------------------------------------------------------------------------|
| Context  | In 1899, John Jacob Astor IV invested \$ 100,000 for Tesla to further develop and produce a new lighting system. Instead, Tesla used the money to fund his <a href="#">Colorado Springs experiments</a> .                                                                                                                                                                                                                                                                                                                                                                                                                                                                                                                         |
| Original | What did Tesla spend Astor's money on ? (0.78)                                                                                                                                                                                                                                                                                                                                                                                                                                                                                                                                                                                                                                                                                    |
| Before   | did                                                                                                                                                                                                                                                                                                                                                                                                                                                                                                                                                                                                                                                                                                                               |
| After    | spend Astor money on ?                                                                                                                                                                                                                                                                                                                                                                                                                                                                                                                                                                                                                                                                                                            |
| Context  | The Colorado experiments had prepared Tesla for the establishment of the <a href="#">trans-Atlantic wireless telecommunications facility</a> known as Wardenclyffe near Shoreham, Long Island.                                                                                                                                                                                                                                                                                                                                                                                                                                                                                                                                    |
| Original | What did Tesla establish following his Colorado experiments ?                                                                                                                                                                                                                                                                                                                                                                                                                                                                                                                                                                                                                                                                     |
| Before   | experiments ?                                                                                                                                                                                                                                                                                                                                                                                                                                                                                                                                                                                                                                                                                                                     |
| After    | What Tesla establish experiments ?                                                                                                                                                                                                                                                                                                                                                                                                                                                                                                                                                                                                                                                                                                |
| Context  | The Broncos defeated the Pittsburgh Steelers in the divisional round, 2316, by scoring 11 points in the final three minutes of the game. They then beat the defending Super Bowl XLIX champion <a href="#">New England Patriots</a> in the AFC Championship Game, 2018, by intercepting a pass on New England's 2-point conversion attempt with 17 seconds left on the clock. Despite Manning's problems with interceptions during the season, he didn't throw any in their two playoff games.                                                                                                                                                                                                                                    |
| Original | Who did the Broncos defeat in the AFC Championship game ?                                                                                                                                                                                                                                                                                                                                                                                                                                                                                                                                                                                                                                                                         |
| Before   | Who the defeat the                                                                                                                                                                                                                                                                                                                                                                                                                                                                                                                                                                                                                                                                                                                |
| After    | Who Broncos defeat AFC Championship game                                                                                                                                                                                                                                                                                                                                                                                                                                                                                                                                                                                                                                                                                          |
| Context  | In 2014, economists with the Standard & Poor's rating agency concluded that the widening disparity between the U.S.'s wealthiest citizens and the rest of the nation had slowed its recovery from the 2008-2009 recession and made it more prone to <a href="#">boom-and-bust cycles</a> . To partially remedy the wealth gap and the resulting slow growth, S&P recommended increasing access to education. It estimated that if the average United States worker had completed just one more year of school, it would add an additional \$105 billion in growth to the country's economy over five years.                                                                                                                       |
| Original | What is the United States at risk for because of the recession of 2008 ?                                                                                                                                                                                                                                                                                                                                                                                                                                                                                                                                                                                                                                                          |
| Before   | is the risk the                                                                                                                                                                                                                                                                                                                                                                                                                                                                                                                                                                                                                                                                                                                   |
| After    | What risk because of the 2008                                                                                                                                                                                                                                                                                                                                                                                                                                                                                                                                                                                                                                                                                                     |
| Context  | The Central Region, consisting of present-day Hebei, Shandong, Shanxi, the south-eastern part of present-day Inner Mongolia and the Henan areas to the north of the Yellow River, was considered the most important region of the dynasty and directly governed by the Central Secretariat (or Zhongshu Sheng) at <a href="#">Khanbaliq</a> (modern Beijing); similarly, another top-level administrative department called the Bureau of Buddhist and Tibetan Affairs (or Xuanzheng Yuan) held administrative rule over the whole of modern-day Tibet and a part of Sichuan, Qinghai and Kashmir.                                                                                                                                |
| Original | Where was the Central Secretariat based ?                                                                                                                                                                                                                                                                                                                                                                                                                                                                                                                                                                                                                                                                                         |
| Before   | the based                                                                                                                                                                                                                                                                                                                                                                                                                                                                                                                                                                                                                                                                                                                         |
| After    | was Central Secretariat based                                                                                                                                                                                                                                                                                                                                                                                                                                                                                                                                                                                                                                                                                                     |
| Context  | It became clear that managing the Apollo program would exceed the capabilities of Robert R. Gilruth's Space Task Group, which had been directing the nation's manned space program from NASA's Langley Research Center. So Gilruth was given authority to grow his organization into a new NASA center, the Manned Spacecraft Center (MSC). A site was chosen in <a href="#">Houston, Texas</a> , on land donated by Rice University, and Administrator Webb announced the conversion on September 19, 1961. It was also clear NASA would soon outgrow its practice of controlling missions from its Cape Canaveral Air Force Station launch facilities in Florida, so a new Mission Control Center would be included in the MSC. |
| Original | Where was the Manned Spacecraft Center located ?                                                                                                                                                                                                                                                                                                                                                                                                                                                                                                                                                                                                                                                                                  |
| Before   | Where                                                                                                                                                                                                                                                                                                                                                                                                                                                                                                                                                                                                                                                                                                                             |
| After    | Where was Manned Center located                                                                                                                                                                                                                                                                                                                                                                                                                                                                                                                                                                                                                                                                                                   |

## SNLI

|          |                                                                                                |
|----------|------------------------------------------------------------------------------------------------|
| Premise  | a man in a black shirt is playing a guitar .                                                   |
| Original | the man is wearing a blue shirt .                                                              |
| Answer   | contradiction                                                                                  |
| Before   | blue                                                                                           |
| After    | man blue shirt                                                                                 |
| Premise  | two female basketball teams watch suspenseful as the basketball nears the basket .             |
| Original | two teams are following the movement of a basketball .                                         |
| Answer   | entailment                                                                                     |
| Before   | .                                                                                              |
| After    | movement                                                                                       |
| Premise  | trucks racing                                                                                  |
| Original | there are vehicles .                                                                           |
| Answer   | entailment                                                                                     |
| Before   | are                                                                                            |
| After    | vehicles                                                                                       |
| Premise  | a woman , whose face can only be seen in a mirror , is applying eyeliner in a dimly lit room . |
| Original | a man is playing softball .                                                                    |
| Answer   | contradiction                                                                                  |
| Before   | man playing                                                                                    |
| After    | a man                                                                                          |
| Premise  | a tan dog jumping over a red and blue toy                                                      |
| Original | a dog playing                                                                                  |
| Answer   | entailment                                                                                     |
| Before   | dog                                                                                            |
| After    | playing                                                                                        |
| Premise  | a man in a white shirt has his mouth open and is adjusting dials .                             |
| Original | a man is sleeping .                                                                            |
| Answer   | contradiction                                                                                  |
| Before   | sleeping                                                                                       |
| After    | man sleeping                                                                                   |

## VQA

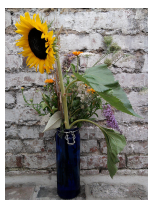

Original    what color is the flower  
 Answer    yellow  
 Before    flower  
 After    what color is flower

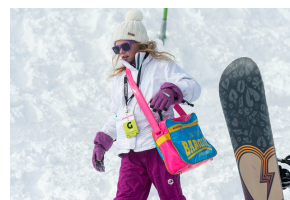

Original    what letter is on the lanyard  
 Answer    g  
 Before    letter is on lanyard  
 After    what letter is the lanyard

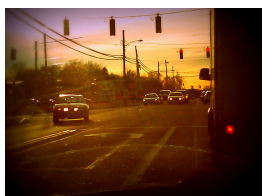

Original    are the cars lights on  
 Answer    yes  
 Before    cars  
 After    lights

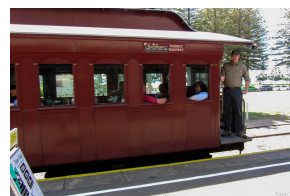

Original    if the man steps forward, will he fall onto the track  
 Answer    no  
 Before    if the fall the  
 After    if the steps forward, fall onto the

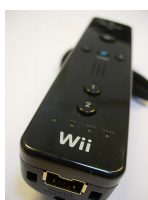

Original    do this take batteries  
 Answer    yes  
 Before    batteries  
 After    batteries

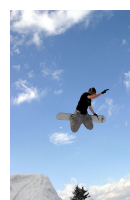

Original    are there any clouds in the sky  
 Answer    yes  
 Before    are clouds  
 After    there clouds sky

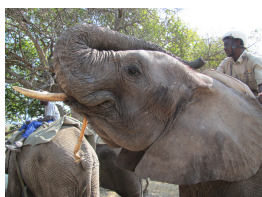

Original    what is the man riding  
 Answer    elephant  
 Before    man riding  
 After    what riding

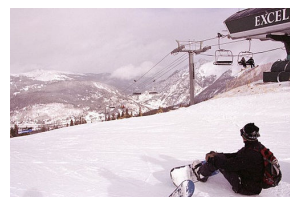

Original    what color is the skiers backpack  
 Answer    black  
 Before    color  
 After    what color is the skiers

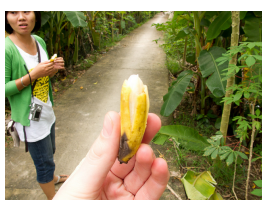

Original    what kind of pants is the girl wearing  
 Answer    jeans  
 Before    kind of pants wearing  
 After    what kind of pants

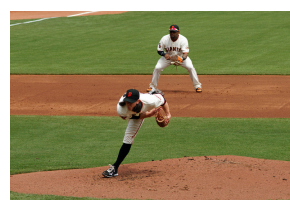

Original    are the giants playing  
 Answer    yes  
 Before    are  
 After    giants playing
